# Supplementary material for: Accuracy of ground heat flux simulation methods in the surface energy balance-based remote sensing evapotranspiration models
Source: Copernicus journal article supplement (doi:10.5194/hess-2022-125), 2022-04-19
Supplement: Supplementary file 1 [file hess-2022-125-supplement.pdf]

1 **Supplementary Materials**

2

**Table S1.** FLUXNET observation sites used in this study

| Site_ID | Stard | End  | DOI                  | Site_ID | Stard | End  | DOI                  |
|---------|-------|------|----------------------|---------|-------|------|----------------------|
| AR-SLu  | 2009  | 2011 | 10.18140/FLX/1440191 | IT-Cp2  | 2012  | 2014 | 10.18140/FLX/1440233 |
| AR-Vir  | 2009  | 2012 | 10.18140/FLX/1440192 | IT-Cpz  | 1997  | 2009 | 10.18140/FLX/1440168 |
| AT-Neu  | 2002  | 2012 | 10.18140/FLX/1440121 | IT-Isp  | 2013  | 2014 | 10.18140/FLX/1440234 |
| AU-Ade  | 2007  | 2009 | 10.18140/FLX/1440193 | IT-La2  | 2000  | 2002 | 10.18140/FLX/1440235 |
| AU-ASM  | 2010  | 2014 | 10.18140/FLX/1440194 | IT-Lav  | 2003  | 2014 | 10.18140/FLX/1440169 |
| AU-Cpr  | 2010  | 2014 | 10.18140/FLX/1440195 | IT-MBo  | 2003  | 2013 | 10.18140/FLX/1440170 |
| AU-Cum  | 2012  | 2014 | 10.18140/FLX/1440196 | IT-Noe  | 2004  | 2014 | 10.18140/FLX/1440171 |
| AU-DaP  | 2007  | 2013 | 10.18140/FLX/1440123 | IT-PT1  | 2002  | 2004 | 10.18140/FLX/1440172 |
| AU-DaS  | 2008  | 2014 | 10.18140/FLX/1440122 | IT-Ren  | 1998  | 2013 | 10.18140/FLX/1440173 |
| AU-Dry  | 2008  | 2014 | 10.18140/FLX/1440197 | IT-Ro1  | 2000  | 2008 | 10.18140/FLX/1440174 |
| AU-Emr  | 2011  | 2013 | 10.18140/FLX/1440198 | IT-Ro2  | 2002  | 2012 | 10.18140/FLX/1440175 |
| AU-Fog  | 2006  | 2008 | 10.18140/FLX/1440124 | IT-SR2  | 2013  | 2014 | 10.18140/FLX/1440236 |
| AU-Gin  | 2011  | 2014 | 10.18140/FLX/1440199 | IT-SRo  | 1999  | 2012 | 10.18140/FLX/1440176 |
| AU-GWW  | 2013  | 2014 | 10.18140/FLX/1440200 | IT-Tor  | 2008  | 2014 | 10.18140/FLX/1440237 |
| AU-How  | 2001  | 2014 | 10.18140/FLX/1440125 | JP-BBY  | 2015  | 2018 |                      |
| AU-Lox  | 2008  | 2009 | 10.18140/FLX/1440247 | JP-SwL  | 2016  | 2016 |                      |
| AU-RDF  | 2011  | 2013 | 10.18140/FLX/1440201 | KR-CRK  | 2015  | 2018 |                      |
| AU-Rig  | 2011  | 2014 | 10.18140/FLX/1440202 | MY-PSO  | 2003  | 2009 | 10.18140/FLX/1440240 |
| AU-Rob  | 2014  | 2014 | 10.18140/FLX/1440203 | NL-Hor  | 2004  | 2011 | 10.18140/FLX/1440177 |
| AU-Stp  | 2008  | 2014 | 10.18140/FLX/1440204 | NL-Loo  | 1996  | 2014 | 10.18140/FLX/1440178 |
| AU-TTE  | 2012  | 2014 | 10.18140/FLX/1440205 | NZ-Kop  | 2012  | 2015 |                      |
| AU-Wac  | 2005  | 2008 | 10.18140/FLX/1440127 | PA-SPn  | 2007  | 2009 | 10.18140/FLX/1440180 |
| AU-Whr  | 2011  | 2014 | 10.18140/FLX/1440206 | PA-SPs  | 2007  | 2009 | 10.18140/FLX/1440179 |
| AU-Wom  | 2010  | 2014 | 10.18140/FLX/1440207 | PH-RiF  | 2012  | 2014 |                      |
| AU-Ync  | 2012  | 2014 | 10.18140/FLX/1440208 | RU-Ch2  | 2014  | 2016 |                      |
| BE-Bra  | 1996  | 2014 | 10.18140/FLX/1440128 | RU-Che  | 2002  | 2016 | 10.18140/FLX/1440181 |
| BE-Lon  | 2004  | 2014 | 10.18140/FLX/1440129 | RU-Cok  | 2003  | 2016 | 10.18140/FLX/1440182 |
| BE-Vie  | 1996  | 2014 | 10.18140/FLX/1440130 | RU-Fy2  | 2015  | 2018 |                      |
| BR-Npw  | 2013  | 2016 |                      | RU-Fyo  | 1998  | 2014 | 10.18140/FLX/1440183 |
| BR-Sa3  | 2000  | 2004 | 10.18140/FLX/1440033 | RU-Ha1  | 2002  | 2004 | 10.18140/FLX/1440184 |
| CA-Gro  | 2003  | 2014 | 10.18140/FLX/1440034 | RU-Tks  | 2010  | 2014 | 10.18140/FLX/1440244 |
| CA-Man  | 1994  | 2008 | 10.18140/FLX/1440035 | SD-Dem  | 2005  | 2009 | 10.18140/FLX/1440186 |
| CA-NS1  | 2001  | 2005 | 10.18140/FLX/1440036 | SE-Deg  | 2014  | 2018 |                      |
| CA-NS2  | 2001  | 2005 | 10.18140/FLX/1440037 | SJ-Adv  | 2011  | 2014 | 10.18140/FLX/1440241 |
| CA-NS3  | 2001  | 2005 | 10.18140/FLX/1440038 | SN-Dhr  | 2010  | 2013 | 10.18140/FLX/1440246 |
| CA-NS4  | 2002  | 2005 | 10.18140/FLX/1440039 | US-A03  | 2015  | 2018 |                      |
| CA-NS5  | 2001  | 2005 | 10.18140/FLX/1440040 | US-A10  | 2012  | 2018 |                      |
| CA-NS6  | 2001  | 2005 | 10.18140/FLX/1440041 | US-AR1  | 2009  | 2012 | 10.18140/FLX/1440103 |
| CA-NS7  | 2002  | 2005 | 10.18140/FLX/1440042 | US-AR2  | 2009  | 2012 | 10.18140/FLX/1440104 |
| CA-Oas  | 1996  | 2010 | 10.18140/FLX/1440043 | US-ARb  | 2005  | 2006 | 10.18140/FLX/1440064 |
| CA-Obs  | 1997  | 2010 | 10.18140/FLX/1440044 | US-ARc  | 2005  | 2006 | 10.18140/FLX/1440065 |

|        |      |      |                      |        |      |      |                      |
|--------|------|------|----------------------|--------|------|------|----------------------|
| CA-Qfo | 2003 | 2010 | 10.18140/FLX/1440045 | US-ARM | 2003 | 2012 | 10.18140/FLX/1440066 |
| CA-SF1 | 2003 | 2006 | 10.18140/FLX/1440046 | US-Atq | 2003 | 2016 | 10.18140/FLX/1440067 |
| CA-SF2 | 2001 | 2005 | 10.18140/FLX/1440047 | US-Beo | 2013 | 2014 |                      |
| CA-SF3 | 2001 | 2006 | 10.18140/FLX/1440048 | US-Bes | 2013 | 2015 |                      |
| CA-TP1 | 2002 | 2014 | 10.18140/FLX/1440050 | US-Bi1 | 2016 | 2018 |                      |
| CA-TP2 | 2002 | 2007 | 10.18140/FLX/1440051 | US-Bi2 | 2017 | 2018 |                      |
| CA-TP3 | 2002 | 2014 | 10.18140/FLX/1440052 | US-Blo | 1997 | 2007 | 10.18140/FLX/1440068 |
| CA-TP4 | 2002 | 2014 | 10.18140/FLX/1440053 | US-BZB | 2014 | 2016 |                      |
| CA-TPD | 2012 | 2014 | 10.18140/FLX/1440112 | US-BZF | 2014 | 2016 |                      |
| CG-Tch | 2006 | 2009 | 10.18140/FLX/1440142 | US-BZS | 2015 | 2016 |                      |
| CH-Cha | 2005 | 2016 | 10.18140/FLX/1440131 | US-CRT | 2011 | 2013 | 10.18140/FLX/1440117 |
| CH-Dav | 1997 | 2017 | 10.18140/FLX/1440132 | US-EDN | 2018 | 2018 |                      |
| CH-Fru | 2005 | 2014 | 10.18140/FLX/1440133 | US-EML | 2015 | 2018 |                      |
| CH-Oe1 | 2002 | 2008 | 10.18140/FLX/1440135 | US-GBT | 1999 | 2006 | 10.18140/FLX/1440118 |
| CN-Cha | 2003 | 2005 | 10.18140/FLX/1440137 | US-GLE | 2004 | 2014 | 10.18140/FLX/1440069 |
| CN-Cng | 2007 | 2010 | 10.18140/FLX/1440209 | US-Goo | 2002 | 2006 | 10.18140/FLX/1440070 |
| CN-Dan | 2004 | 2005 | 10.18140/FLX/1440138 | US-Ho1 | 2012 | 2018 |                      |
| CN-Din | 2003 | 2005 | 10.18140/FLX/1440139 | US-IB2 | 2004 | 2011 | 10.18140/FLX/1440072 |
| CN-Du2 | 2006 | 2008 | 10.18140/FLX/1440140 | US-ICs | 2014 | 2016 |                      |
| CN-Du3 | 2009 | 2010 | 10.18140/FLX/1440210 | US-Ivo | 2004 | 2016 | 10.18140/FLX/1440073 |
| CN-Ha2 | 2003 | 2005 | 10.18140/FLX/1440211 | US-KS1 | 2002 | 2002 | 10.18140/FLX/1440074 |
| CN-HaM | 2002 | 2004 | 10.18140/FLX/1440190 | US-KS2 | 2003 | 2006 | 10.18140/FLX/1440075 |
| CN-Hgu | 2015 | 2017 |                      | US-Lin | 2009 | 2010 | 10.18140/FLX/1440107 |
| CN-Qia | 2003 | 2005 | 10.18140/FLX/1440141 | US-Los | 2000 | 2018 | 10.18140/FLX/1440076 |
| CN-Sw2 | 2010 | 2012 | 10.18140/FLX/1440212 | US-LWW | 1997 | 1998 | 10.18140/FLX/1440077 |
| CZ-BK1 | 2004 | 2014 | 10.18140/FLX/1440143 | US-Me1 | 2004 | 2005 | 10.18140/FLX/1440078 |
| CZ-BK2 | 2004 | 2012 | 10.18140/FLX/1440144 | US-Me2 | 2002 | 2014 | 10.18140/FLX/1440079 |
| CZ-wet | 2006 | 2014 | 10.18140/FLX/1440145 | US-Me3 | 2004 | 2009 | 10.18140/FLX/1440080 |
| DE-Akm | 2009 | 2014 | 10.18140/FLX/1440213 | US-Me4 | 1996 | 2000 | 10.18140/FLX/1440081 |
| DE-Dgw | 2015 | 2018 |                      | US-Me5 | 2000 | 2002 | 10.18140/FLX/1440082 |
| DE-Geb | 2001 | 2014 | 10.18140/FLX/1440146 | US-Me6 | 2010 | 2014 | 10.18140/FLX/1440099 |
| DE-Gri | 2004 | 2014 | 10.18140/FLX/1440147 | US-MRM | 2012 | 2013 |                      |
| DE-Hai | 2000 | 2012 | 10.18140/FLX/1440148 | US-Myb | 2010 | 2018 | 10.18140/FLX/1440105 |
| DE-Hte | 2011 | 2018 |                      | US-NC4 | 2012 | 2016 |                      |
| DE-Kli | 2004 | 2014 | 10.18140/FLX/1440149 | US-NGB | 2012 | 2018 |                      |
| DE-Lkb | 2009 | 2013 | 10.18140/FLX/1440214 | US-NGC | 2017 | 2018 |                      |
| DE-Lnf | 2002 | 2012 | 10.18140/FLX/1440150 | US-NR1 | 1998 | 2014 | 10.18140/FLX/1440087 |
| DE-Obe | 2008 | 2014 | 10.18140/FLX/1440151 | US-Oho | 2004 | 2013 | 10.18140/FLX/1440088 |
| DE-RuR | 2011 | 2014 | 10.18140/FLX/1440215 | US-ORv | 2011 | 2015 | 10.18140/FLX/1440102 |
| DE-RuS | 2011 | 2014 | 10.18140/FLX/1440216 | US-OWC | 2015 | 2016 |                      |
| DE-Seh | 2007 | 2010 | 10.18140/FLX/1440217 | US-Prr | 2010 | 2014 | 10.18140/FLX/1440113 |
| DE-SfN | 2012 | 2014 | 10.18140/FLX/1440219 | US-Snd | 2010 | 2015 |                      |
| DE-Spw | 2010 | 2014 | 10.18140/FLX/1440220 | US-Sne | 2016 | 2018 |                      |
| DE-Tha | 1996 | 2014 | 10.18140/FLX/1440152 | US-SRC | 2008 | 2014 | 10.18140/FLX/1440098 |
| DE-Zrk | 2013 | 2018 | 10.18140/FLX/1440221 | US-SRG | 2008 | 2014 | 10.18140/FLX/1440114 |
| DK-Eng | 2005 | 2008 | 10.18140/FLX/1440153 | US-SRM | 2004 | 2014 | 10.18140/FLX/1440090 |
| DK-Fou | 2005 | 2005 | 10.18140/FLX/1440154 | US-Srr | 2014 | 2017 |                      |

|        |      |      |                      |        |      |      |                      |
|--------|------|------|----------------------|--------|------|------|----------------------|
| DK-Sor | 1996 | 2014 | 10.18140/FLX/1440155 | US-StJ | 2016 | 2016 |                      |
| ES-Amo | 2007 | 2012 | 10.18140/FLX/1440156 | US-Syv | 2001 | 2014 | 10.18140/FLX/1440091 |
| ES-LgS | 2007 | 2009 | 10.18140/FLX/1440225 | US-Ton | 2001 | 2014 | 10.18140/FLX/1440092 |
| ES-LJu | 2004 | 2013 | 10.18140/FLX/1440157 | US-Tw1 | 2011 | 2018 | 10.18140/FLX/1440108 |
| FI-Hyy | 1996 | 2016 | 10.18140/FLX/1440158 | US-Tw2 | 2012 | 2013 | 10.18140/FLX/1440109 |
| FI-Jok | 2000 | 2003 | 10.18140/FLX/1440159 | US-Tw3 | 2013 | 2014 | 10.18140/FLX/1440110 |
| FI-Let | 2009 | 2012 | 10.18140/FLX/1440227 | US-Tw4 | 2013 | 2018 | 10.18140/FLX/1440111 |
| FI-Lom | 2006 | 2010 | 10.18140/FLX/1440228 | US-Tw5 | 2018 | 2018 |                      |
| FI-Si2 | 2012 | 2016 |                      | US-Twt | 2009 | 2017 | 10.18140/FLX/1440106 |
| FI-Sod | 2001 | 2014 | 10.18140/FLX/1440160 | US-Uaf | 2011 | 2018 |                      |
| FR-Fon | 2005 | 2014 | 10.18140/FLX/1440161 | US-UMd | 2007 | 2014 | 10.18140/FLX/1440101 |
| FR-Gri | 2004 | 2014 | 10.18140/FLX/1440162 | US-Var | 2000 | 2014 | 10.18140/FLX/1440094 |
| FR-LBr | 1996 | 2008 | 10.18140/FLX/1440163 | US-WCr | 1999 | 2014 | 10.18140/FLX/1440095 |
| FR-Pue | 2000 | 2014 | 10.18140/FLX/1440164 | US-Whs | 2007 | 2014 | 10.18140/FLX/1440097 |
| GF-Guy | 2004 | 2014 | 10.18140/FLX/1440165 | US-Wi0 | 2002 | 2002 | 10.18140/FLX/1440055 |
| GH-Ank | 2011 | 2014 | 10.18140/FLX/1440229 | US-Wi1 | 2003 | 2003 | 10.18140/FLX/1440054 |
| GL-NuF | 2008 | 2014 | 10.18140/FLX/1440222 | US-Wi2 | 2003 | 2003 | 10.18140/FLX/1440056 |
| GL-ZaF | 2008 | 2011 | 10.18140/FLX/1440223 | US-Wi3 | 2002 | 2004 | 10.18140/FLX/1440057 |
| GL-ZaH | 2000 | 2014 | 10.18140/FLX/1440224 | US-Wi4 | 2002 | 2005 | 10.18140/FLX/1440058 |
| HK-MPM | 2016 | 2018 |                      | US-Wi5 | 2004 | 2004 | 10.18140/FLX/1440059 |
| ID-Pag | 2016 | 2017 |                      | US-Wi6 | 2002 | 2003 | 10.18140/FLX/1440060 |
| IT-BCi | 2004 | 2018 | 10.18140/FLX/1440166 | US-Wi7 | 2005 | 2005 | 10.18140/FLX/1440061 |
| IT-CA1 | 2011 | 2014 | 10.18140/FLX/1440230 | US-Wi8 | 2002 | 2002 | 10.18140/FLX/1440062 |
| IT-CA2 | 2011 | 2014 | 10.18140/FLX/1440231 | US-Wi9 | 2004 | 2005 | 10.18140/FLX/1440063 |
| IT-CA3 | 2011 | 2014 | 10.18140/FLX/1440232 | US-Wkg | 2004 | 2014 | 10.18140/FLX/1440096 |
| IT-Cas | 2009 | 2010 |                      | US-WPT | 2011 | 2013 | 10.18140/FLX/1440116 |
| IT-Col | 1996 | 2014 | 10.18140/FLX/1440167 | ZM-Mon | 2000 | 2009 | 10.18140/FLX/1440189 |
